# Supplementary material for: The effects of rumen-protected tryptophan (RPT) on production performance and relevant hormones of dairy cows
Source: PeerJ. 2022 Sep 13;10:e13831. doi: 10.7717/peerj.13831 (PMC9480067; doi:10.7717/peerj.13831)
Supplement: Supplemental Information 1 [file peerj-10-13831-s001.xlsx]

## Sheet: milk yield, dry matter intake
		Milk yield										DMI
	days	control	14g/d	28g/d			SEM					days	control	14g/d	28g/d		SEM
	0	44.86	44.27	44.56			3.11	3.32	3.2			0	19.9583	20.7463	23.9166		0.9	2.9	1.9
	7	45.68	44.16	44.31			3.26	3.42	3.97			7	23.7891	19.3881	20.2949		1.4	1.7	1.2
	14	41.82	43.81	42.76			3.39	3.58	3.95			14	20.2864	21.9382	23.4556		1.1	0.8	3.6
	21	43.02	44.06	42.46			3.48	3.59	3.91			21	20.8422	19.8866	18.0349		0.6	2.3	2.4
	28	44.84	47.21	43.43			4.05	3.86	3.97			28	21.005	21.5967	22.8198		1.8	3.1	1.3
	35	41.48	43.61	45.01			3.45	4.09	4.04			35	17.7049	20.6037	18.2516		2.2	1.7	2.7
	42	40.28	45.81	45.39			4.86	4.19	4.33			42	23.484	24.7406	21.7267		2.8	2.6	2.3

## Sheet: DHI
				control	14g/d	28g/d		sem
			Fat(%)	3.17	3.58	3.67		0.39	0.55	0.5
			Protein(%)	3.09	3.42	3.41		0.08	0.09	0.16
			Lactose(%)	4.87	4.8	4.8		0.04	0.07	0.07
			TS(%)	12.01	12.7	12.8		0.49	0.59	0.6
			SNF(%)	8.84	9.12	9.12		0.09	0.11	0.16
			Fat yield(kg/d)	1.26	1.6	1.68		0.16	0.26	0.27
			Protein yield(kg/d)	1.24	1.56	1.56		0.11	0.15	0.1
			Lactose yield(kg/d)	1.96	2.18	2.2		0.17	0.15	0.19
			TS yield(kg/d)	4.83	5.77	5.83		0.38	0.52	0.51
			SNF yield(kg/d)	3.56	4.14	4.17		0.27	0.36	0.3
			SCC(×103cells/mL)	171.3	146.1	139.2		46.7	49.5	56.5

## Sheet: 5-HT
	different feeding dose	5-HT mean				different feeding days	5-HT mean			different feeding time	5-HT mean
		control	14g/d	28g/d		0	559.8±110.9			10:00AM	599.2±95.6
		637.1±89.4	529.4±86.5	634.5±87.2		2	642.2±108.4			10:00PM	598.4±100.5
						4	663.4±118.2
						8	687.1±106.8
						16	612.2±121.2

## Sheet: MT
	different feeding dose	melatonin mean				different feeding days	melatonin mean			different feeding time	melatonin mean
		control	14g/d	28g/d		0	42.75±1.95			10:00AM	47.99±1.14
		42.89±1.62	48.72±1.81	50.2±2.00		2	45.36±1.86			10:00PM	46.06±1.20
						4	48.75±2.21
						8	48.99±1.93
						16	52.4±2.55

## Sheet: PRL
different feeding dose	PRL mean						different feeding days	PRL mean	SEM			different feeding time	PRL mean	sem
	control	14g/d	28g/d				0	12.19	1.02			10:00AM	13.09	3.02
	12.13±0.72	13.52±0.83	14.08±0.85				2	13.06	1.16			10:00PM	13.49	3.04
							4	13.78	1.01
							8	14.17	1.03
							16	14.26	1.08

## Sheet: GH
						feeding day	GH mean	sem			feeding time	GH mean	sem
feeding dose	control	14g/d	28g/d			0	5.14	0.15			10:00AM	5.19	0.64
GH mean	5.19	5.09	5			2	5	0.29			10:00PM	4.19	0.66
sem	0.11	0.16	0.33			4	5.13	0.25
						8	5.29	0.18
						16	5.02	0.28

## Sheet: IGF-1
						feeding days	IGF-1 mean	sem			feeding time	IGF-1 mean	sem
feeding dose	control	14g/d	28g/d			0	164.9	10.2			10:00AM	192.3	11.4
IGF-1 mean	176.1	183.1	204.6			2	170.8	9.6			10:00PM	182.3	12.2
sem	11.5	13.2	13.7			4	184.6	13.6
						8	196.8	11.5
						16	207.3	11.6
